# Supplementary material
Source: Springer Nature journal article supplement (https://www.springermedizin.de/resource/supplementary/12877_2013_1007_MOESM1_ESM.pdf/9440890)

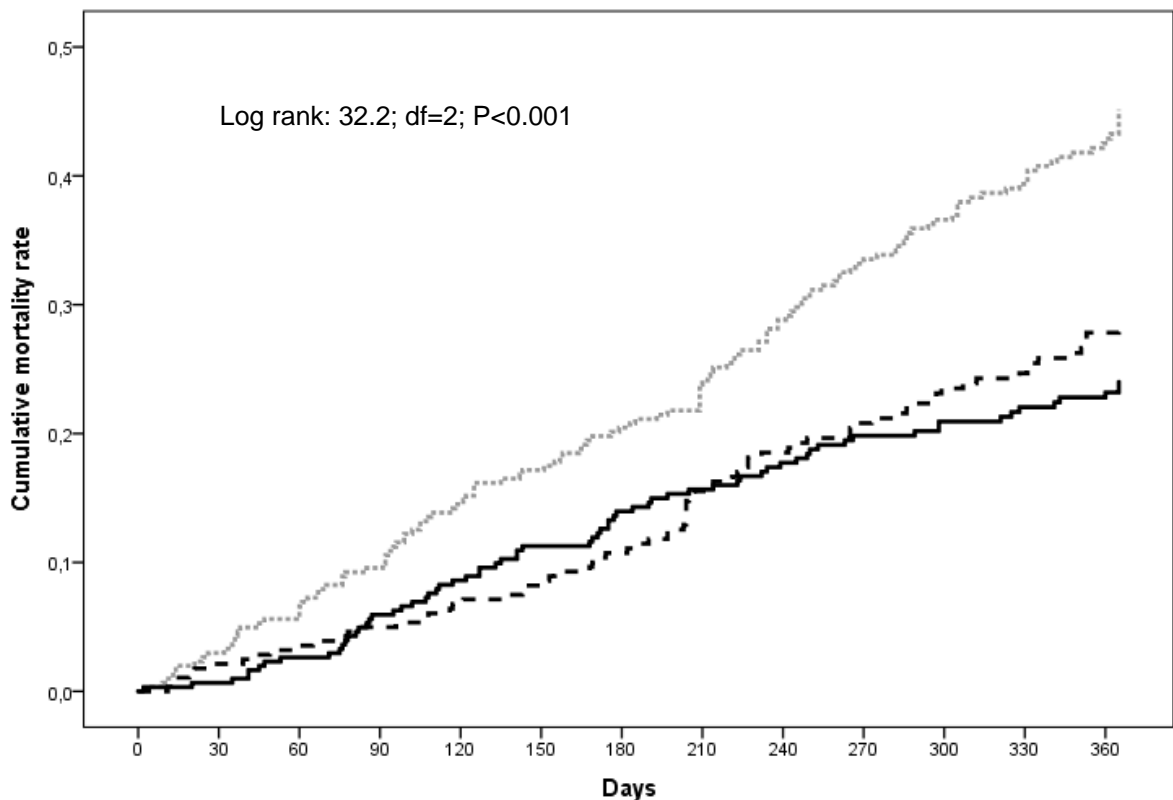

|                  |     |     |     |
|------------------|-----|-----|-----|
| High CDS group   | 305 | 245 | 209 |
| Middle CDS group | 282 | 236 | 193 |
| Low CDS group    | 303 | 233 | 162 |
| Total            | 890 | 714 | 564 |

Supplement: MOESM1 [file 9440890]
